# Supplementary material for: The role of the terminal cysteine moiety in a metallopeptide mimicking the active site of the NiSOD enzyme
Source: Royal Society of Chemistry journal article supplement (doi:10.1039/d3dt03638c), 2023-12-12
Supplement: d3dt03638c1.pdf [file d3dt03638c1.pdf]

## ELECTRONIC SUPPLEMENTARY INFORMATION

# The role of the terminal cysteine moiety in a metalloprotein mimicking the active site of the NiSOD enzyme

*Dóra Bonczidai-Kelemen,<sup>a, b</sup> Klaudia Tóth,<sup>a</sup> I. Fábrián,<sup>a</sup> N. Lihí<sup>a \*</sup>*

<sup>a</sup> HUN-REN–UD Mechanisms of Complex Homogeneous and Heterogeneous Chemical Reactions Research Group, Department of Inorganic and Analytical Chemistry, Faculty of Science and Technology, University of Debrecen, H-4032 Debrecen, Hungary

<sup>b</sup> Doctoral School of Chemistry, University of Debrecen, Debrecen H-4032, Hungary

Corresponding author. [lihi.norbert@science.unideb.hu](mailto:lihi.norbert@science.unideb.hu) (N.L.).

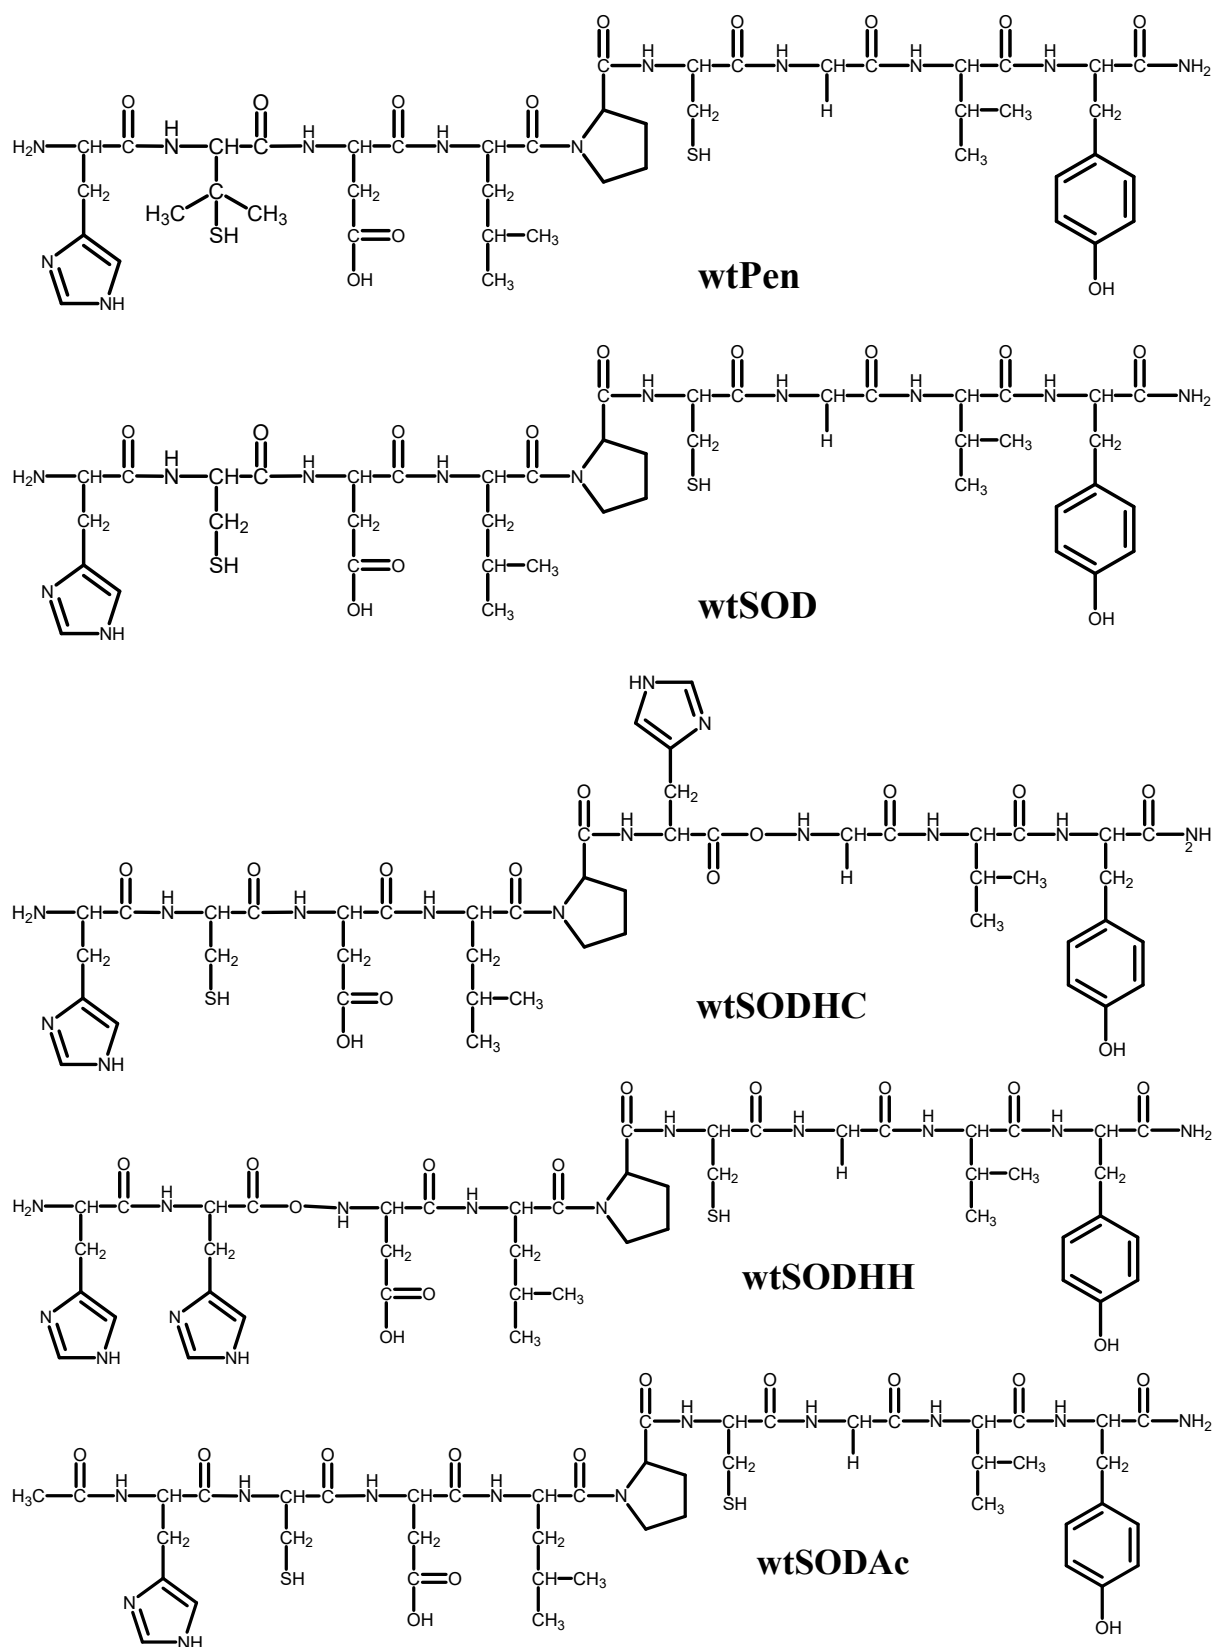

**Scheme S1.** Structural formulae of NiSOD related peptides.

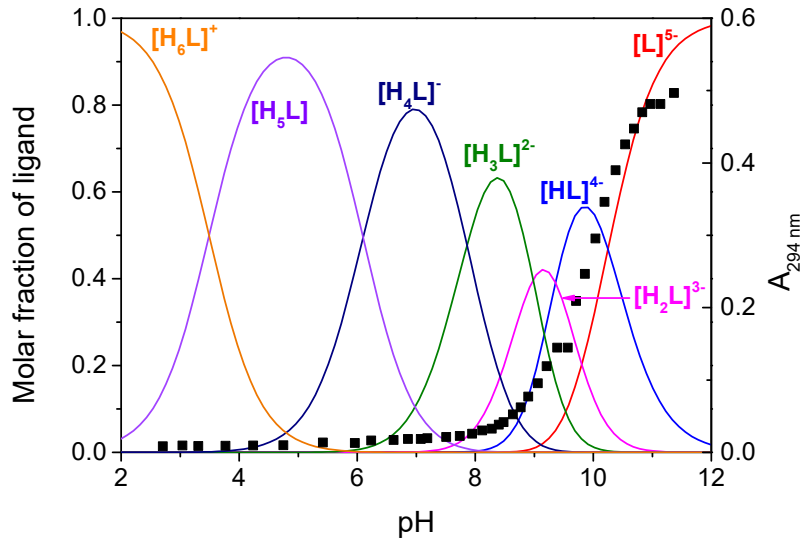

**Figure S1.** Concentration distribution curves and the absorbance at 294 nm as a function of pH recorded in the H<sup>+</sup>/wtCC system.  $c_{\text{wtCC}} = 0.99$  mM,  $I = 0.2$  M KCl,  $T = 25$  °C,  $l = 2$  mm.

$$c_{\text{Ni(II)}} = [\text{Ni(II)}] + \sum_{i=1}^n p\beta_{pqr} [\text{Ni(II)}]_i^p [\text{wtCC}]_i^r [\text{H}^+]_i^q \quad (\text{S1})$$

$$c_{\text{wtCC}} = [\text{wtCC}] + \sum_{i=1}^n r\beta_{pqr} [\text{Ni(II)}]_i^p [\text{wtCC}]_i^r [\text{H}^+]_i^q \quad (\text{S2})$$

$$c_{\text{H}^+} = [\text{H}^+] + \sum_{i=1}^n q\beta_{pqr} [\text{Ni(II)}]_i^p [\text{wtCC}]_i^r [\text{H}^+]_i^q \quad (\text{S3})$$

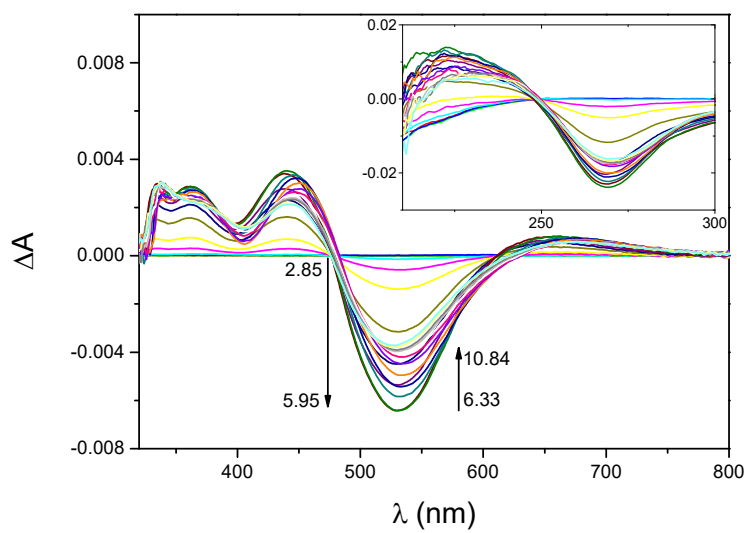

**Figure S2.** pH-dependent CD spectra recorded in the Ni(II)/wtCC system at 0.9:1 metal to ligand ratio.  $c_{\text{wtCC}} = 1.11$  mM,  $c_{\text{Ni(II)}} = 1.04$  mM,  $I = 0.2$  M KCl,  $T = 25$  °C,  $l = 1$  mm.

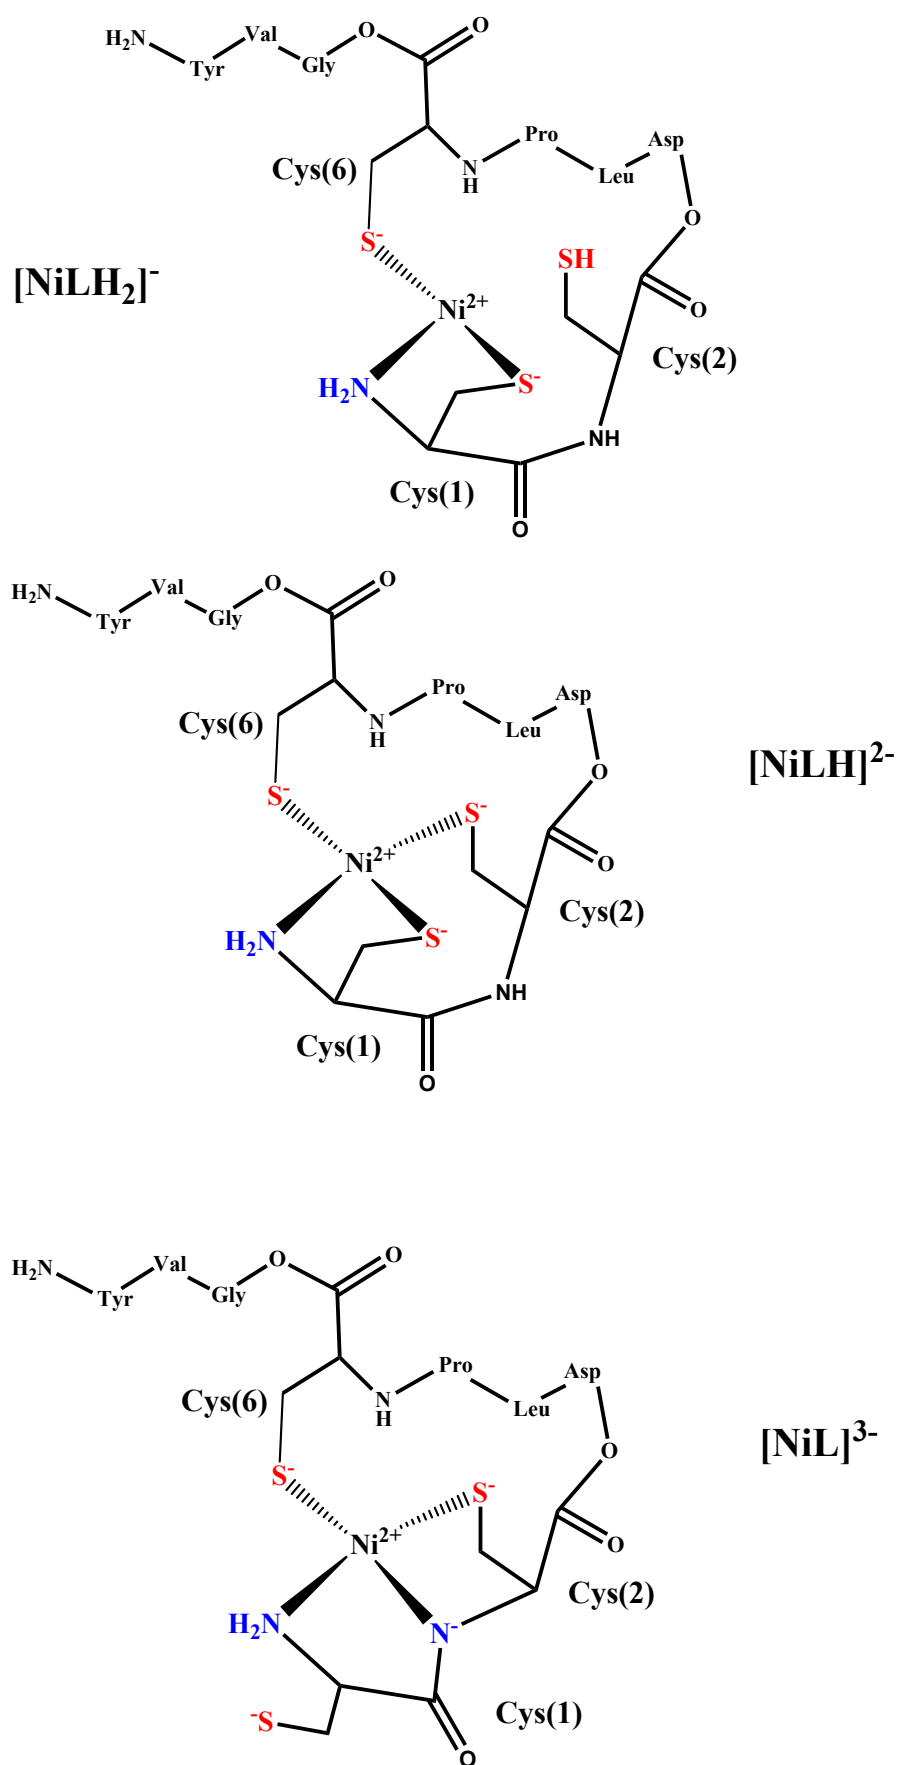

**Scheme S2.** Postulated binding modes of the complexes formed in the Ni(II)/wtCC system.

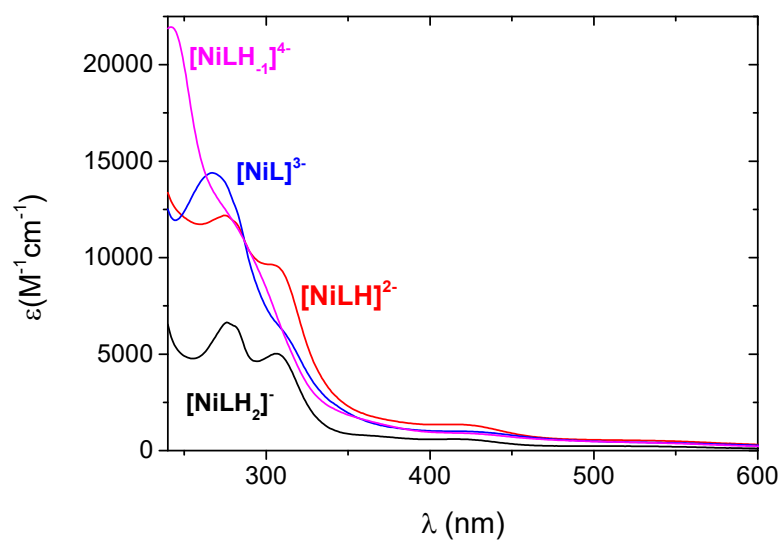

**Figure S3.** Calculated individual spectra of the complexes formed in the Ni(II)/wtCC system.

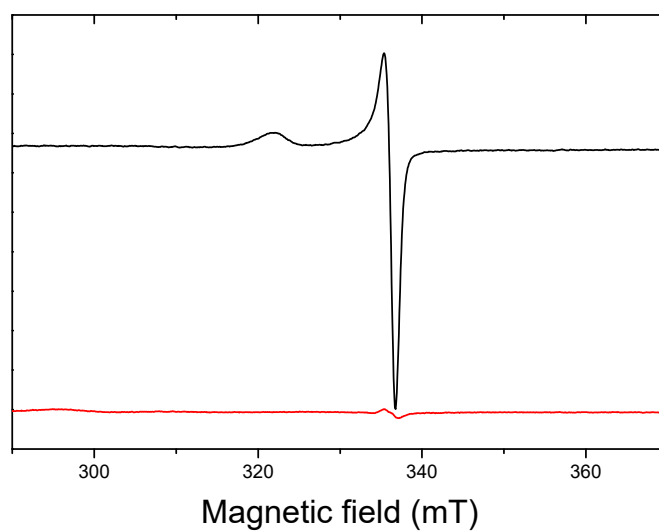

**Figure S4.** Frozen solution CW-EPR spectrum of  $\text{KO}_2$  (black) and the spectrum recorded after the addition of the Ni/wtCC system at pH 10.0 (red). The spectra were recorded at 77 K.

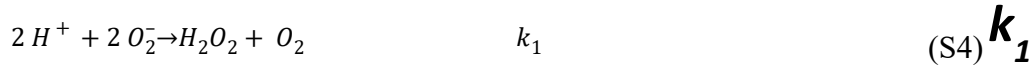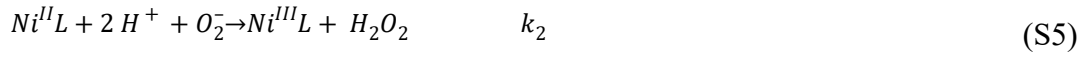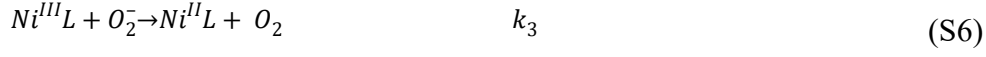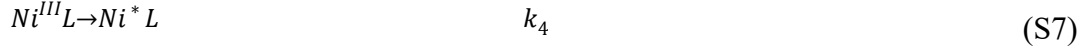

$$\frac{d[O_2^-]}{dt} = -k_1 \times [O_2^-]^2 - k_2 \times [Ni^{II}L][O_2^-] - k_3 \times [Ni^{III}L][O_2^-] \quad (S8)$$

$$\frac{d[H_2O_2]}{dt} = k_1 \times [O_2^-]^2 + k_2 \times [Ni^{II}L][O_2^-] \quad (S9)$$

$$\frac{d[Ni^{II}L]}{dt} = -k_2 \times [Ni^{II}L][O_2^-] + k_3 \times [Ni^{III}L][O_2^-] \quad (S10)$$

$$\frac{d[Ni^{III}L]}{dt} = k_2 \times [Ni^{II}L][O_2^-] - k_3 \times [Ni^{III}L][O_2^-] - k_4 \times [Ni^*L] \quad (S11)$$

$$\frac{d[Ni^*L]}{dt} = k_4 \times [Ni^{III}L] \quad (S12)$$

$$Abs = \varepsilon_{Ni(II)} \times [Ni^{II}L] + \varepsilon_{Ni(III)} \times [Ni^{III}L] + \varepsilon_{Ni^*} \times [Ni^*L] + \varepsilon_{O_2^-} \times [O_2^-] + \varepsilon_{H_2O_2} \times [H_2O_2] \quad (S13)$$

**Table S1.** Kinetic parameters of the reaction between superoxide anion and Ni(II)/wtCC system at different pH values.

|       | pH = 7.6                    | pH = 7.8                    | pH = 8.1                    | Unit           |
|-------|-----------------------------|-----------------------------|-----------------------------|----------------|
| $k_2$ | $(6.6 \pm 0.6) \times 10^7$ | $(2.6 \pm 0.2) \times 10^7$ | $(1.1 \pm 0.2) \times 10^7$ | $M^{-1}s^{-1}$ |
| $k_3$ | $(1.6 \pm 0.4) \times 10^8$ | $(1.8 \pm 0.1) \times 10^8$ | $(1.7 \pm 0.2) \times 10^8$ | $M^{-1}s^{-1}$ |
| $k_4$ | $1310 \pm 90$               | $842 \pm 4$                 | $801 \pm 6$                 | $s^{-1}$       |
